# Supplementary material
Source: PubMed Central journal article supplement (PMC6689251)
Supplement: NIHMS1531818-supplement-11.pdf [file NIHMS1531818-supplement-11.pdf]

1 **Supplementary Tables 1-5**

2 **Supplementary Table 1: Additional clinical features and details of the index case at**  
 3 **presentation**

4

| Measurements, results, clinical actions | Features of lumbar puncture                                      |                            |
|-----------------------------------------|------------------------------------------------------------------|----------------------------|
|                                         | Value                                                            | Reference values and notes |
| <i>Nucleated cells/μL</i>               | 590                                                              |                            |
| <i>Neutrophils</i>                      | 80%                                                              |                            |
| <i>Lymphocytes</i>                      | 6%                                                               |                            |
| <i>Glucose</i>                          | 67 mg/dl                                                         | Reference: 45-75           |
| <i>Protein</i>                          | 135 mg/dl                                                        | Reference: 15-40           |
|                                         |                                                                  |                            |
| <i>Negative results</i>                 | Bacterial cultures, HSV-1/2 PCR, cytology, paraneoplastic panels |                            |
|                                         |                                                                  |                            |
| <i>Medication administered</i>          | Broad spectrum antibiotics, acyclovir                            |                            |

5

6 **Supplementary Table 2: Characteristics of 22 cases of ICI-induced meningoencephalitis**

|                                            |             |
|--------------------------------------------|-------------|
| Age (years; median, range)                 | 65 (26-83)  |
| Female gender                              | 6 (27)      |
| Primary cancer melanoma                    | 20 (91)     |
| <b>Agent</b>                               |             |
| Anti-PD-1/PD-L1 monotherapy                | 6 (27)      |
| Ipilimumab monotherapy                     | 6 (27)      |
| Anti-PD-1 + ipilimumab                     | 10 (44)     |
| Prior brain metastases?                    | 5 (23)      |
| Active brain metastases?                   | 2 (9)       |
| Prior brain surgery?                       | 2 (9)       |
| Prior brain radiation                      | 2 (9)       |
| Neurologic co-morbidities                  | 7 (32)*     |
| Prior autoimmune disease                   | 3 (14)      |
| <b>Time to onset</b> (days, median, range) | 80 (4-684)  |
| Anti-PD-1/PD-L1 monotherapy                | 86 (5-684)  |
| Ipilimumab monotherapy                     | 58 (39-138) |
| Anti-PD-1 + ipilimumab                     | 93 (4-517)  |
| <b>Symptoms</b>                            |             |
| Confusion                                  | 11 (50)     |
| Headaches                                  | 8 (36)      |
| Seizures                                   | 5 (23)      |
| Fever                                      | 4 (18)      |
| Focal neurologic deficits                  | 5 (23)      |
| <b>Concurrent irAEs</b>                    |             |
| None                                       | 10 (44)     |
| Colitis/enteritis                          | 3 (14)      |
| Thyroiditis                                | 3 (14)      |

|                                      |                      |
|--------------------------------------|----------------------|
| Rash                                 | 3 (14)               |
| Other                                | 3 (14) <sup>#</sup>  |
| <b>MRI findings</b>                  |                      |
| Unremarkable                         | 16 (73)              |
| Findings present                     | 6 (27) <sup>**</sup> |
| <b>Cerebrospinal fluid analysis</b>  |                      |
| Nucleated cells/mL (median, range)   | 37 (2-590)           |
| <b>Hospitalized</b>                  | 20 (91)              |
| Multiple hospitalizations            | 5 (23)               |
| Length of stay (days; median, range) | 6.5 (2-120)          |
| <b>Treatments</b>                    |                      |
| High dose steroids                   | 19 (86)              |
| Pulse dose (e.g. 1g/daily)           | 3 (14)               |
| 1-2mg/kg                             | 16 (73)              |
| Intravenous immunoglobulin           | 4 (18)               |
| Other (Plasma exchange, rituximab)   | 2 (9)                |
| <b>Outcome</b>                       |                      |
| Resolved                             | 15 (68)              |
| Persistent symptoms                  | 5 (22)               |
| Fatal                                | 2 (9) <sup>##</sup>  |

\*Includes seizure disorder (N=3), cerebrovascular accident (N=2), migraines, cerebral arteriovenous formation. <sup>#</sup>Hypophysitis, hepatitis, and epididymitis. <sup>\*\*</sup>Enhancement of temporal lobes (N=3), enhancement of occipital lobes (N=2), perivascular enhancement in caudate/putamen/internal capsule (N=1), cranial nerve enhancement (N=1). <sup>##</sup>Both in patients with MRI findings

**Supplementary Table 3: Cases of non-immunotherapy-induced encephalitis assessed for EBNA1 staining, NanoString DSP, and RNA-seq**

| Diagnosis                                                                                                    | Age/Sex | Pathology notes              | EBNA1+ (% cells) | PD-L1+ (% cells) |
|--------------------------------------------------------------------------------------------------------------|---------|------------------------------|------------------|------------------|
| Chronic meningoencephalitis consistent with clinical history of atypical Rasmussen's encephalitis            | 50/F    | Relatively mild inflammation | 0                | 0                |
| Meningoencephalitis with anti-calcium channel antibodies. CMV identified reactive cells present <sup>c</sup> | 40/M    |                              | 0                | 5                |
| Toxoplasmosis                                                                                                | 34/M    | Small sample                 | 0                | 0                |
| Progressive Multifocal Leukoencephalopathy (JC virus infection)                                              | 62/F    | Very small sample            | 0                | 2                |
| Demyelinating process (multiple sclerosis)                                                                   | 25/F    |                              | 0                | 0                |
| Rasmussen's encephalitis <sup>b</sup>                                                                        | 3/M     |                              | 0                | 0                |
| Autoimmune encephalitis of unknown etiology <sup>a</sup>                                                     | 50/M    | Relatively mild inflammation | 0                | 1                |
| Acute hemorrhagic leukoencephalitis (variant of acute disseminated encephalomyelitis)                        | 63/M    |                              | 0                | 0                |
| Rasmussen's encephalitis                                                                                     | 5/F     |                              | 0                | 5                |

<sup>a</sup> Non-ICI-encephalitis (1) in **Figure 2**

<sup>b</sup> Non-ICI-encephalitis (2) in **Figure 2**

<sup>c</sup> Non-ICI-encephalitis (3) in **Figure 2**

18 **Supplementary Table 4: HLA haplotype of the index case**

| <b>Locus</b>    | <b>Allele 1 / Allele 2</b> |
|-----------------|----------------------------|
| <i>HLA-A</i>    | 02:01:01 / 02:01:01        |
| <i>HLA-B</i>    | 39:01:01 / 51:01:01        |
| <i>HLA-C</i>    | 12:03:01 / 14:02:01        |
| <i>HLA-DQA</i>  | 01:02:01 / 05:01:01        |
| <i>HLA-DQB</i>  | 02:01:01 / 06:04:01        |
| <i>HLA-DRB1</i> | 03:01:01 / 13:02:01        |
| <i>HLA-DRB3</i> | 01:01:02 / 03:01:01        |
| <i>HLA-DPB1</i> | 03:01:01 / 04:01:01        |

19

20 **Supplementary Table 5: TCRs containing the [PSGS] motif are viral-specific and not**

21 **associated with autoimmune reactivity**

| <b>CDR3</b>       | <b>TRBV<br/>gene</b> | <b>TRBJ<br/>gene</b> | <b>HLA<br/>restriction</b> | <b>Epitope</b> | <b>Epitope<br/>origin</b> | <b>PMID</b> |
|-------------------|----------------------|----------------------|----------------------------|----------------|---------------------------|-------------|
| CASSVAPSGSESPLHF  | V9*01                | J1-6*01              | HLA-DRA*01                 | PKYVKQNTLKLAT  | InfluenzaA                | 12466894    |
| CASRPSGSELIYEQYF  | V5-1*01              | J2-7*01              | HLA-A*02                   | GILGFVFTL      | InfluenzaA                | 28423320    |
| CASSPPSGSAYNEQFF  | V9*01                | J2-1*01              | HLA-B*07:02                | LPRRSGAAGA     | InfluenzaA                | 28636589    |
| CAISDPSGSSYNEQFF  | V10-3*01             | J2-1*01              | HLA-B*07:02                | RPRGEVRFL      | HSV-2                     | 20139278    |
| CASSPPSGSYEQYF    | V7-9*01              | J2-7*01              | HLA-B*08                   | FLKEKGGL       | HIV-1                     | 17287271    |
| CASSQEPSGSWGEQYF  | V3-1*01              | J2-7*01              | HLA-A*02                   | CINGVCWTV      | HCV                       | 28146579    |
| CASSQEPSGSWGEQYF  | V3-1*01              | J2-7*01              | HLA-A*02                   | CINGVCWTV      | HCV                       | 28146579    |
| CASSQEPSGSWGEQYF  | V3-1*01              | J2-7*01              | HLA-A*02                   | CINGVCWTV      | HCV                       | 28146579    |
| CASSPPSGSGFNEQFF  | V18*01               | J2-1*01              | HLA-A*02:01                | GLCTLVAML      | EBV                       | 12504586    |
| CASSSDPSGSIAYEQYF | V5-1*01              | J2-7*01              | HLA-B*08:01                | RAKFKQLL       | EBV                       | 24512815    |
| CASSPPSGSYEQYF    | V7-9*01              | J2-7*01              | HLA-A*02                   | NLVPMVATV      | CMV                       | 28423320    |
| CSAPSGSSYEQYF     | V20-1*01             | J2-7*01              | HLA-A*02                   | NLVPMVATV      | CMV                       | 28423320    |

|                  |         |         |             |           |     |          |
|------------------|---------|---------|-------------|-----------|-----|----------|
| CATSRVPSGSYEQYF  | V15*01  | J2-7*01 | HLA-A*02    | NLVPMVATV | CMV | 28423320 |
| CASSLVPSGSTDTQYF | V5-1*01 | J2-3*01 | HLA-A*02:01 | NLVPMVATV | CMV | 28636589 |

22

23
